# Supplementary material
Source: PubMed Central journal article supplement (PMC8046640)

## Supplemental Information

Supplemental Figure 1. *Change in Internalizing Behavior by Teachers' Engagement by Classroom.*

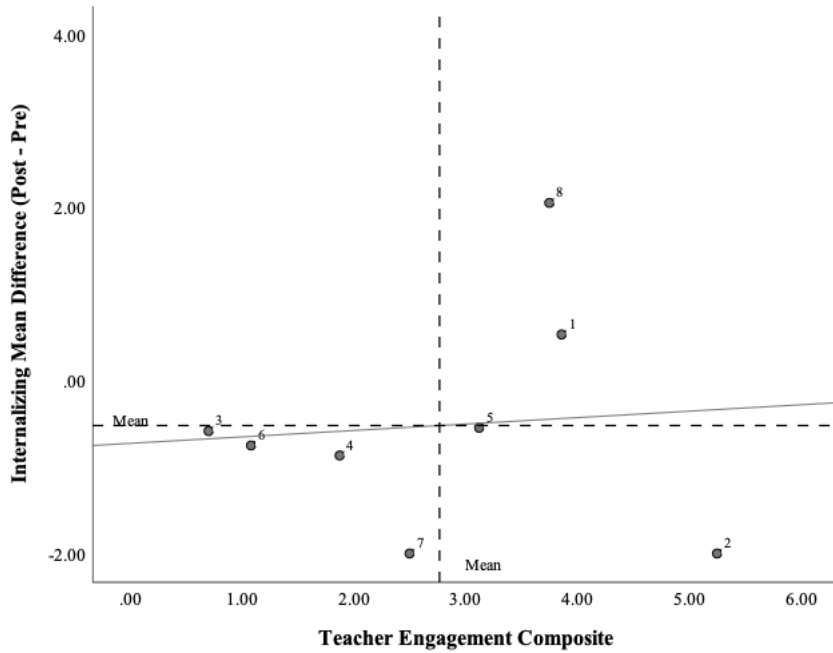

Supplemental Figure 2. *Change in Prosocial Behavior by Teachers' Engagement by Classroom.*

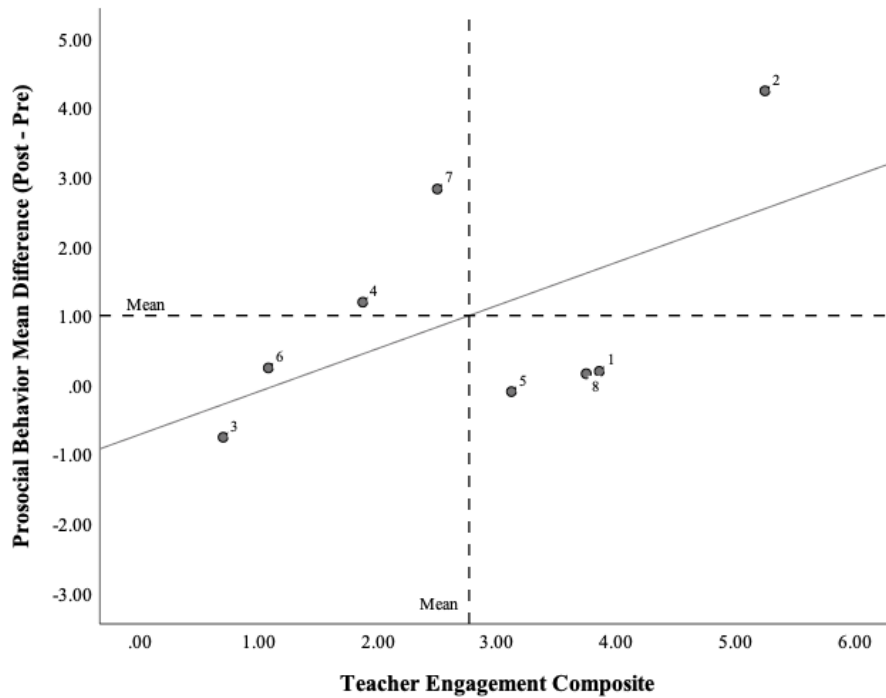

Supplemental Figure 3. *Change in Internalizing Behavior by Students' Session Engagement by Classroom.*

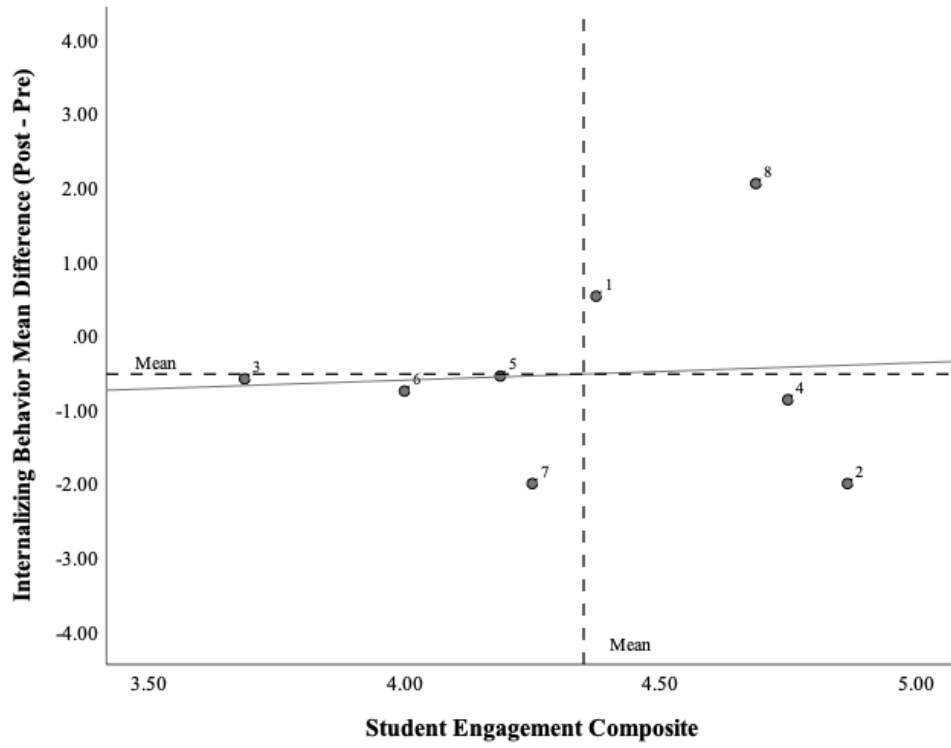

Supplemental Figure 4. *Change in Externalizing Behavior by Students' Session Engagement by Classroom.*

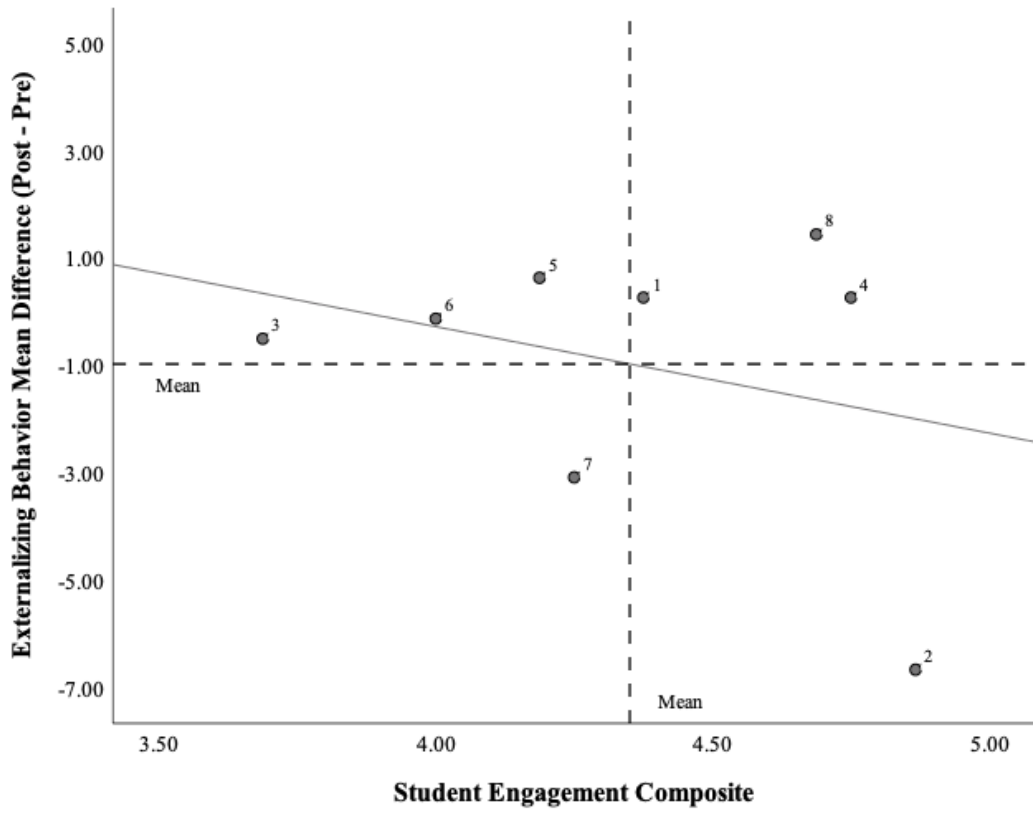

Supplement: 10826_2021_1955_MOESM1_ESM.pdf [file 10826_2021_1955_MOESM1_ESM.pdf]
